# Supplementary material for: Reprocessed MODIS Version 6.1 Leaf Area Index Dataset and Its Evaluation for Land Surface and Climate Modeling
Source: MDPI journal article supplement (doi:10.3390/rs15071780), 2023-03-27
Supplement: s1 [file s1]

Supplementary material for:

**Reprocessed MODIS Version 6.1 Leaf Area Index Dataset and Its Evaluation for Land Surface and Climate Modeling**

**Contents**

1. Characteristics of the validation sites and associated LAI reference maps ..... 2

2. Time series plot of LAI mean values within the reference map extent ..... 5

3. Global growing season mean LAI values and trends of different LAI products ..... 22

## 1. Characteristics of the validation sites and associated LAI reference maps

*Table S1. Characteristics of the validation sites (total 73) and associated LAI reference maps (total 2762). In the table head, “Lat” and “Lon” stand for “latitude” and “longitude” respectively. “LC” is the main land cover type in this site and ENF is short for evergreen needleleaf forest, EBF for evergreen broadleaf forest and MF for mixed (evergreen needleleaf + deciduous broadleaf) forest. “DB” is the database which the map comes from and “BU” is short for Boston University. “MAP” is the average of the values aggregated to the corresponding MODIS pixels from LAI reference map. “MCD” is the mean value of MODIS pixels and “RMCD” is the mean value of reprocessed MODIS pixels. For sites with multi-time observations, the minimum and maximum MAP, MCD, and RMCD values within the observed periods were given.*

| Station    | Country     | Lat   | Lon     | Datasets          | Land Cover | Date                 | MAP (min–max) | MCD (min–max) | RMCD (min–max) | Number of observations |
|------------|-------------|-------|---------|-------------------|------------|----------------------|---------------|---------------|----------------|------------------------|
| AGRO       | USA         | 40.01 | -88.29  | BigFoot           | Crop       | 2000/7/4–2000/8/11   | 2.30–3.10     | 2.36–2.71     | 2.62–2.80      | 2                      |
| KONZ       | USA         | 39.09 | -96.57  | BigFoot           | Grass      | 2000/6/7–2001/8/16   | 2.18–2.96     | 1.44–2.48     | 1.80–2.93      | 4                      |
| NOBS       | Canada      | 55.89 | -98.48  | BigFoot           | ENF        | 2000/7/14–2002/7/14  | 2.78–3.02     | 2.44–3.08     | 2.84–3.23      | 3                      |
| SEVI       | USA         | 34.35 | -106.69 | BigFoot           | Grass      | 2002/11/15–2003/9/15 | 0.05–0.38     | 0.11–0.32     | 0.15–0.38      | 8                      |
| TUND       | USA         | 71.27 | -156.61 | BigFoot           | Grass      | 2002/8/15            | 1.15          | 0.34          | 0.71           | 1                      |
| Ruokolahti | Finland     | 61.53 | 28.71   | Boston University | ENF        | 2000/6/18            | 2.20          | 1.70          | 2.66           | 1                      |
| BART       | USA         | 44.06 | -71.29  | GBOV              | MF         | 2014/10/3–2020/9/9   | 0.83–6.27     | 0.70–6.12     | 0.70–6.80      | 110                    |
| BLAN       | USA         | 39.06 | -78.07  | GBOV              | DBF        | 2016/1/5–2020/9/5    | 0.17–1.82     | 0.38–3.00     | 0.50–3.10      | 121                    |
| CPER       | USA         | 40.82 | -104.75 | GBOV              | Grass      | 2014/5/31–2020/9/20  | 0.03–0.76     | 0.20–1.18     | 0.20–1.30      | 51                     |
| DELA       | USA         | 32.54 | -87.80  | GBOV              | DBF        | 2016/10/20–2020/9/9  | 1.04–5.68     | 0.67–5.77     | 0.67–6.50      | 112                    |
| DSNY       | USA         | 28.13 | -81.44  | GBOV              | Shrub      | 2014/10/24–2020/9/6  | 0.97–4.05     | 0.80–5.00     | 1.11–5.10      | 162                    |
| GUAN       | Puerto Rico | 17.97 | -66.87  | GBOV              | EBF        | 2015/1/31–2020/9/4   | 0.89–4.45     | 0.80–6.60     | 2.44–6.60      | 201                    |
| HAİN       | Germany     | 51.08 | 10.45   | GBOV              | MF         | 2020/1/15–2020/9/6   | 0.91–5.80     | 0.75–5.71     | 0.96–5.78      | 27                     |
| HARV       | USA         | 42.54 | -72.17  | GBOV              | MF         | 2014/4/10–2020/9/19  | 0.85–6.09     | 0.73–6.18     | 0.80–6.50      | 112                    |
| JERC       | USA         | 31.19 | -84.47  | GBOV              | ENF        | 2014/4/13–2020/9/6   | 0.97–4.92     | 0.69–4.53     | 0.98–4.45      | 212                    |
| JORN       | USA         | 32.59 | -106.84 | GBOV              | Shrub      | 2015/4/25–2020/9/13  | 0.03–0.61     | 0.20–0.77     | 0.20–0.77      | 61                     |
| KONA       | USA         | 39.11 | -96.61  | GBOV              | Crop       | 2017/10/2–2020/9/6   | 0.28–1.63     | 0.60–4.70     | 0.60–4.90      | 72                     |
| LAJA       | Puerto Rico | 18.02 | -67.08  | GBOV              | Grass      | 2016/1/14–2020/9/29  | 0.33–1.74     | 0.33–3.20     | 0.74–3.60      | 163                    |
| MOAB       | USA         | 38.25 | -109.39 | GBOV              | Shrub      | 2015/4/14–2019/7/14  | 0.12–0.52     | 0.20–0.48     | 0.20–0.50      | 13                     |
| NRMN       | USA         | 40.05 | -105.58 | GBOV              | ENF        | 2015/6/19–2020/9/3   | 0.11–1.28     | 0.20–1.70     | 0.30–1.90      | 77                     |
| ONAQ       | USA         | 40.18 | -112.45 | GBOV              | Shrub      | 2014/4/9–2020/9/7    | 0.07–0.85     | 0.20–1.00     | 0.24–1.00      | 95                     |
| ORNL       | USA         | 35.96 | -84.28  | GBOV              | MF         | 2015/10/23–2020/9/6  | 0.78–5.62     | 0.53–5.57     | 0.55–5.60      | 119                    |

|                   |               |        |         |          |       |                      |           |           |           |     |
|-------------------|---------------|--------|---------|----------|-------|----------------------|-----------|-----------|-----------|-----|
| OSBS              | USA           | 29.68  | -82.01  | GBOV     | ENF   | 2013/10/5–2020/9/30  | 0.76–4.06 | 0.91–2.88 | 1.13–3.30 | 183 |
| SCBI              | USA           | 38.89  | -78.14  | GBOV     | MF    | 2015/11/16–2020/9/5  | 0.73–6.09 | 0.62–6.15 | 0.62–6.60 | 94  |
| SERC              | USA           | 38.89  | -76.56  | GBOV     | Crop  | 2015/11/13–2020/9/7  | 1.02–6.05 | 0.80–6.80 | 0.94–6.80 | 106 |
| SRER              | USA           | 31.91  | -110.84 | GBOV     | Shrub | 2016/1/27–2020/9/2   | 0.02–0.77 | 0.21–0.82 | 0.27–0.92 | 79  |
| STEI              | USA           | 45.51  | -89.59  | GBOV     | DBF   | 2016/3/20–2020/9/5   | 1.28–5.26 | 0.45–6.15 | 0.70–6.32 | 105 |
| STER              | USA           | 40.46  | -103.03 | GBOV     | Grass | 2014/3/30–2020/9/6   | 0.12–1.19 | 0.41–2.40 | 0.46–2.44 | 72  |
| TALL              | USA           | 32.95  | -87.39  | GBOV     | ENF   | 2015/10/6–2020/9/9   | 1.30–4.30 | 1.55–6.23 | 1.81–6.19 | 116 |
| TUMB              | Australia     | -35.66 | 148.15  | GBOV     | EBF   | 2020/1/23            | 0.70      | 1.00      | 1.45      | 1   |
| UNDE              | USA           | 46.23  | -89.54  | GBOV     | MF    | 2015/10/22–2020/9/5  | 0.93–5.31 | 0.10–5.75 | 0.55–6.28 | 89  |
| VASN              | Spain         | 39.57  | -1.29   | GBOV     | MF    | 2020/1/14–2020/9/25  | 0.08–0.65 | 0.40–1.00 | 0.50–0.70 | 23  |
| WOOD              | USA           | 47.13  | -99.24  | GBOV     | Grass | 2014/5/26–2020/9/5   | 0.14–1.48 | 0.53–2.91 | 0.60–3.12 | 99  |
| 25de Mayo_Alalfa  | Argentina     | -37.91 | -67.75  | ImagineS | Shrub | 2014/2/9             | 0.97      | 0.70      | 0.97      | 1   |
| 25de Mayo_Shurb   | Argentina     | -37.94 | -67.79  | ImagineS | Shrub | 2014/2/9             | 0.82      | 0.68      | 0.80      | 1   |
| Albufera          | Spain         | 39.27  | -0.32   | ImagineS | Crop  | 2014/6/17–2014/8/7   | 0.61–5.84 | 0.81–5.77 | 1.68–5.96 | 5   |
| Barrax-LasTias    | Spain         | 39.05  | -2.10   | ImagineS | Crop  | 2014/5/29–2015/7/22  | 0.44–2.48 | 0.48–0.67 | 0.55–0.92 | 3   |
| Capitanata        | Italy         | 41.46  | 15.49   | ImagineS | Crop  | 2014/3/18–2015/4/23  | 1.86–3.60 | 1.58–3.25 | 1.75–3.27 | 3   |
| Collelongo        | Italy         | 41.85  | 13.59   | ImagineS | DBF   | 2015/7/8–2015/9/25   | 3.22–3.97 | 3.17–4.89 | 3.23–5.03 | 2   |
| LaReina_Cordoba_1 | Spain         | 37.82  | -4.86   | ImagineS | Crop  | 2014/5/20            | 1.19      | 1.02      | 1.29      | 1   |
| LaReina_Cordoba_2 | Spain         | 37.79  | -4.83   | ImagineS | Crop  | 2014/5/20            | 1.57      | 1.22      | 1.60      | 1   |
| Maragua_UpperTana | Kenya         | -0.77  | 36.97   | ImagineS | Crop  | 2016/3/8             | 1.87      | 2.35      | 2.59      | 1   |
| Pshenichne        | Ukraine       | 50.08  | 30.23   | ImagineS | Crop  | 2013/5/14–2015/7/7   | 0.56–3.51 | 0.73–4.93 | 1.09–4.21 | 8   |
| Rosasco           | Italy         | 45.25  | 8.56    | ImagineS | Crop  | 2014/7/3             | 4.32      | 2.80      | 3.06      | 1   |
| SanFernando       | Chile         | -34.72 | -71.00  | ImagineS | Crop  | 2015/1/19            | 2.09      | 1.52      | 1.57      | 1   |
| AHSPECT-Condom    | France        | 43.97  | 0.34    | ImagineS | Crop  | 2015/6/23            | 1.43      | 1.28      | 1.37      | 1   |
| AHSPECT-Creón     |               |        |         |          |       |                      |           |           | 3.91      |     |
| D'armagnac        | France        | 43.99  | -0.05   | ImagineS | Crop  | 2015/6/23            | 2.30      | 3.40      |           | 1   |
| AHSPECT-Meteopol  | France        | 43.57  | 1.37    | ImagineS | Crop  | 2015/6/23            | 1.13      | 2.02      | 2.19      | 1   |
| AHSPECT-Peyrousse | France        | 43.67  | 0.22    | ImagineS | Crop  | 2015/6/23            | 1.66      | 1.84      | 1.99      | 1   |
| AHSPECT-Savenès   | France        | 43.82  | 1.17    | ImagineS | Crop  | 2015/6/23            | 1.28      | 1.25      | 1.32      | 1   |
| AHSPECT-Urgons    | France        | 43.64  | -0.43   | ImagineS | Crop  | 2015/6/23            | 1.93      | 2.18      | 2.31      | 1   |
| SouthWest_1       | France        | 43.55  | 1.09    | ImagineS | Crop  | 2013/6/22–2013/9/4   | 1.28–2.60 | 1.35–2.16 | 1.48–2.29 | 5   |
| SouthWest_2       | France        | 43.45  | 1.15    | ImagineS | Crop  | 2013/6/22–2013/9/4   | 0.73–1.94 | 1.03–1.55 | 1.43–1.71 | 4   |
| Walnut Creek      | USA           | 41.93  | -93.75  | SMEX02   | Crop  | 2002/6/23–2002/7/8   | 1.40–2.89 | 1.55–2.84 | 1.73–2.91 | 3   |
| Camerons          | Australia     | -32.62 | 116.28  | VALERI   | EBF   | 2004/3/3             | 2.13      | 1.84      | 2.04      | 1   |
| Counami           | French Guiana | 5.34   | -53.24  | VALERI   | EBF   | 2001/9/26–2002/10/13 | 4.37–4.93 | 5.41–6.55 | 5.97–6.38 | 2   |
| Demmin            | Germany       | 53.89  | 13.21   | VALERI   | Crop  | 2004/7/12            | 4.19      | 1.75      | 2.10      | 1   |

|               |           |        |        |        |       |                     |           |           |           |   |
|---------------|-----------|--------|--------|--------|-------|---------------------|-----------|-----------|-----------|---|
| Donga         | Benin     | 9.77   | 1.75   | VALERI | Grass | 2005/6/20           | 1.88      | 1.75      | 2.24      | 1 |
| Fundulea      | Romania   | 44.41  | 26.59  | VALERI | Crop  | 2001/5/8–2002/5/24  | 1.51–3.08 | 1.73–2.21 | 2.18–2.56 | 2 |
| Gilching      | Germany   | 48.08  | 11.32  | VALERI | Crop  | 2002/7/18           | 5.45      | 3.08      | 3.17      | 1 |
| Gnangara      | Australia | -31.53 | 115.88 | VALERI | EBF   | 2004/3/1            | 1.00      | 0.92      | 0.99      | 1 |
| Laprida       | Argentina | -36.99 | -60.55 | VALERI | Grass | 2002/10/19          | 2.81      | 1.43      | 2.00      | 1 |
| Larose        | Canada    | 45.38  | -75.22 | VALERI | MF    | 2003/8/7            | 5.85      | 2.58      | 5.80      | 1 |
| Le Larzac     | France    | 43.94  | 3.12   | VALERI | Grass | 2002/7/2            | 0.83      | 1.82      | 2.24      | 1 |
| Les Alpilles  | France    | 43.81  | 4.71   | VALERI | Crop  | 2002/7/23           | 1.69      | 1.19      | 1.22      | 1 |
| Nezer         | France    | 44.57  | -1.04  | VALERI | ENF   | 2002/4/17           | 2.38      | 1.47      | 1.66      | 1 |
| Plan-de-Dieu  | France    | 44.20  | 4.95   | VALERI | Crop  | 2004/7/7            | 1.15      | 0.77      | 0.67      | 1 |
| Puéchabon     | France    | 43.72  | 3.65   | VALERI | MF    | 2001/6/13           | 2.84      | 2.02      | 2.39      | 1 |
| Sonian forest | Belgium   | 50.77  | 4.41   | VALERI | MF    | 2004/6/22           | 5.67      | 4.97      | 4.58      | 1 |
| Sud-Ouest     | France    | 43.51  | 1.24   | VALERI | Crop  | 2002/7/8            | 1.95      | 1.47      | 1.75      | 1 |
| Turco         | Bolivia   | -18.24 | -68.19 | VALERI | Grass | 2001/7/27–2002/8/28 | 0.04–0.30 | 0.21–0.22 | 0.21–0.26 | 2 |
| Wankama       | Niger     | 13.65  | 2.64   | VALERI | Grass | 2005/6/23           | 0.14      | 0.23      | 0.25      | 1 |
| Zhang Bei     | China     | 41.28  | 114.69 | VALERI | Grass | 2002/8/9            | 1.28      | 1.49      | 1.61      | 1 |



## 2. Time series plot of LAI mean values within the reference map extent

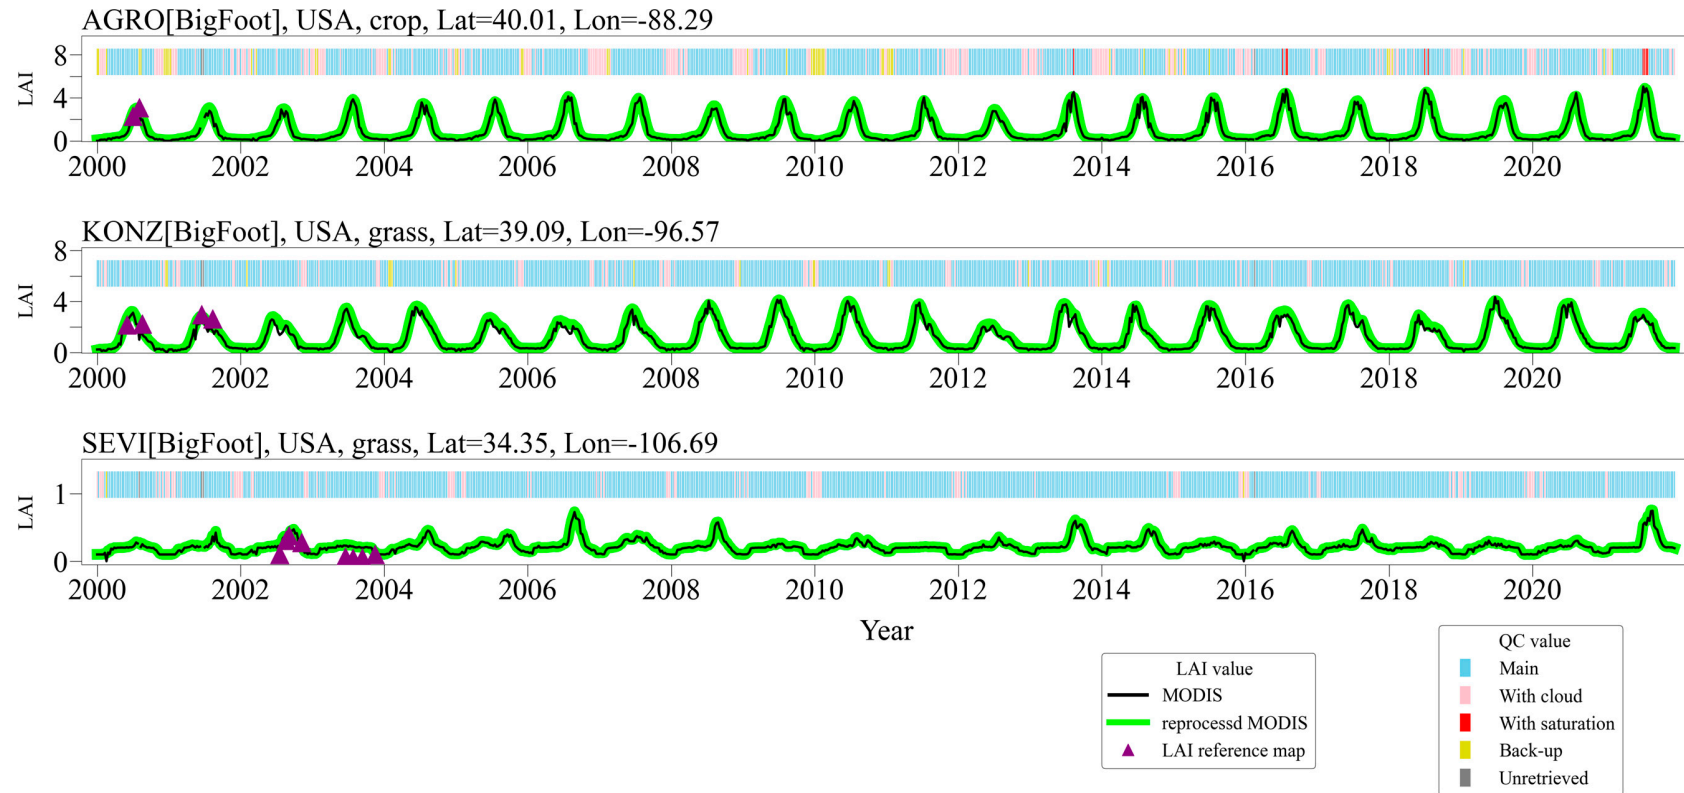

Figure S1. Time series plot of LAI mean values within the reference map extent for sites ARGO, KONZ, SEVI from BigFoot dataset. The QC values, which indicate the retrieved algorithms, are drawn in different colors on the top of time series.

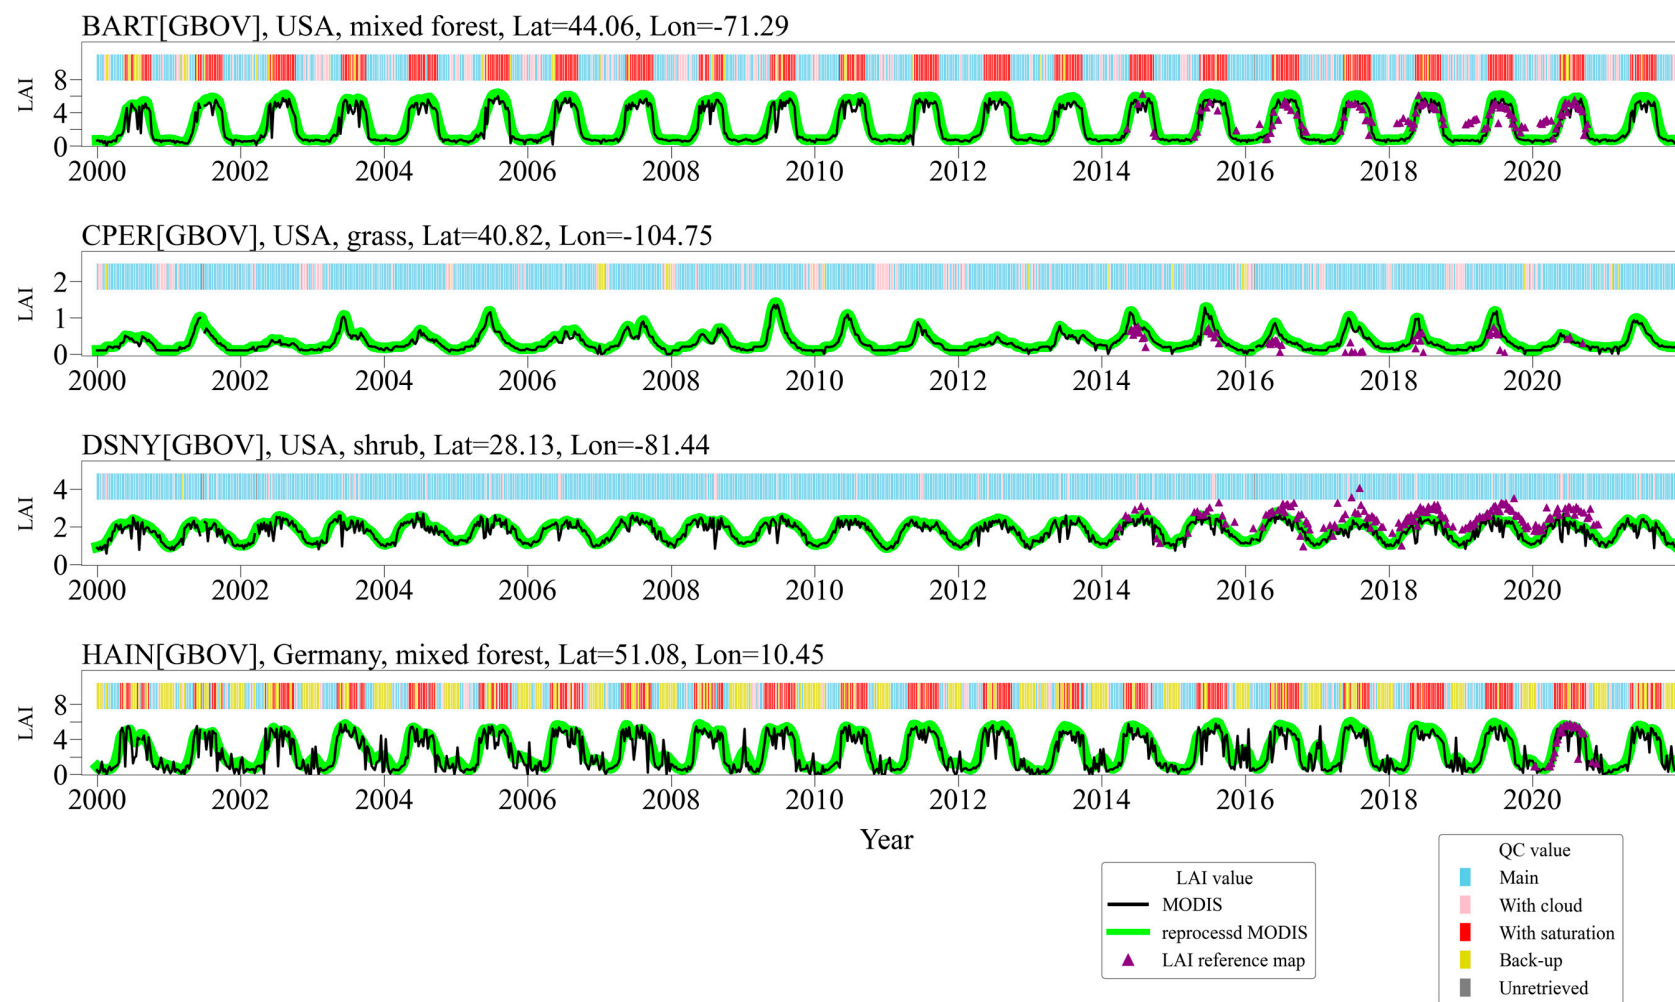

Figure S2. Time series plot of LAI mean values within the reference map extent for sites BART, CPER, DSNY, HAIN from GBOV dataset. The QC values, which indicate the retrieved algorithms, are drawn in different colors on the top of time series.

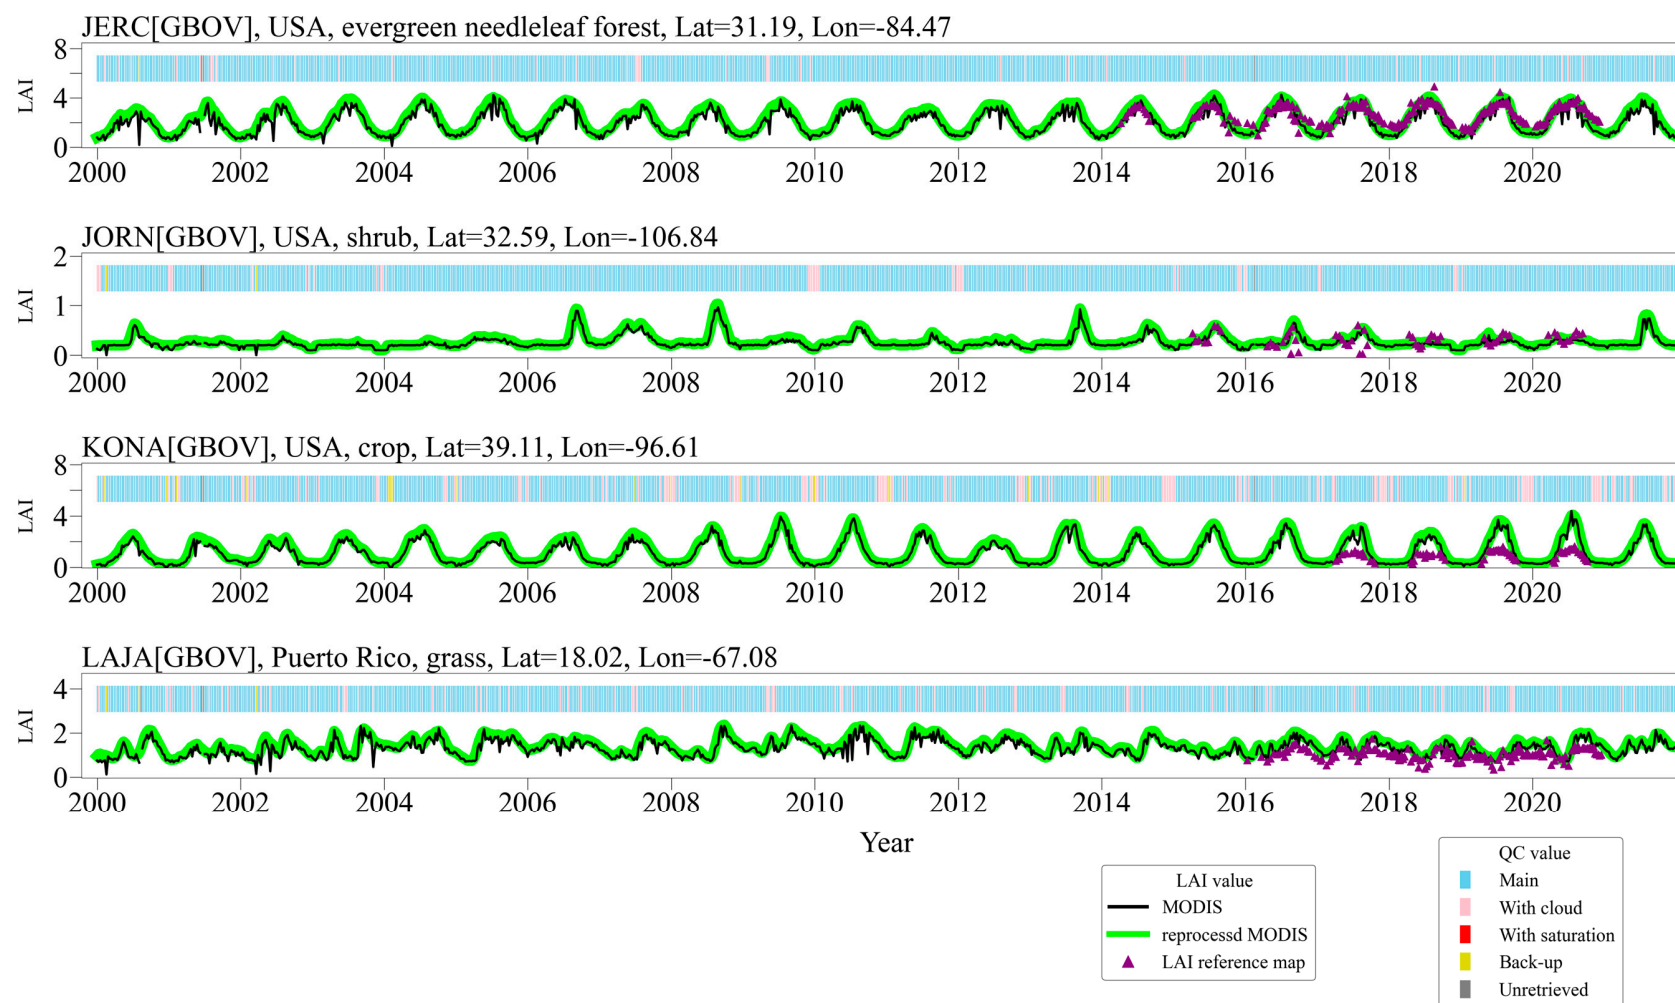

Figure S3. Time series plot of LAI mean values within the reference map extent for sites JERC, JORN, KONA, LAJA from GBOV dataset. The QC values, which indicate the retrieved algorithms, are drawn in different colors on the top of time series.

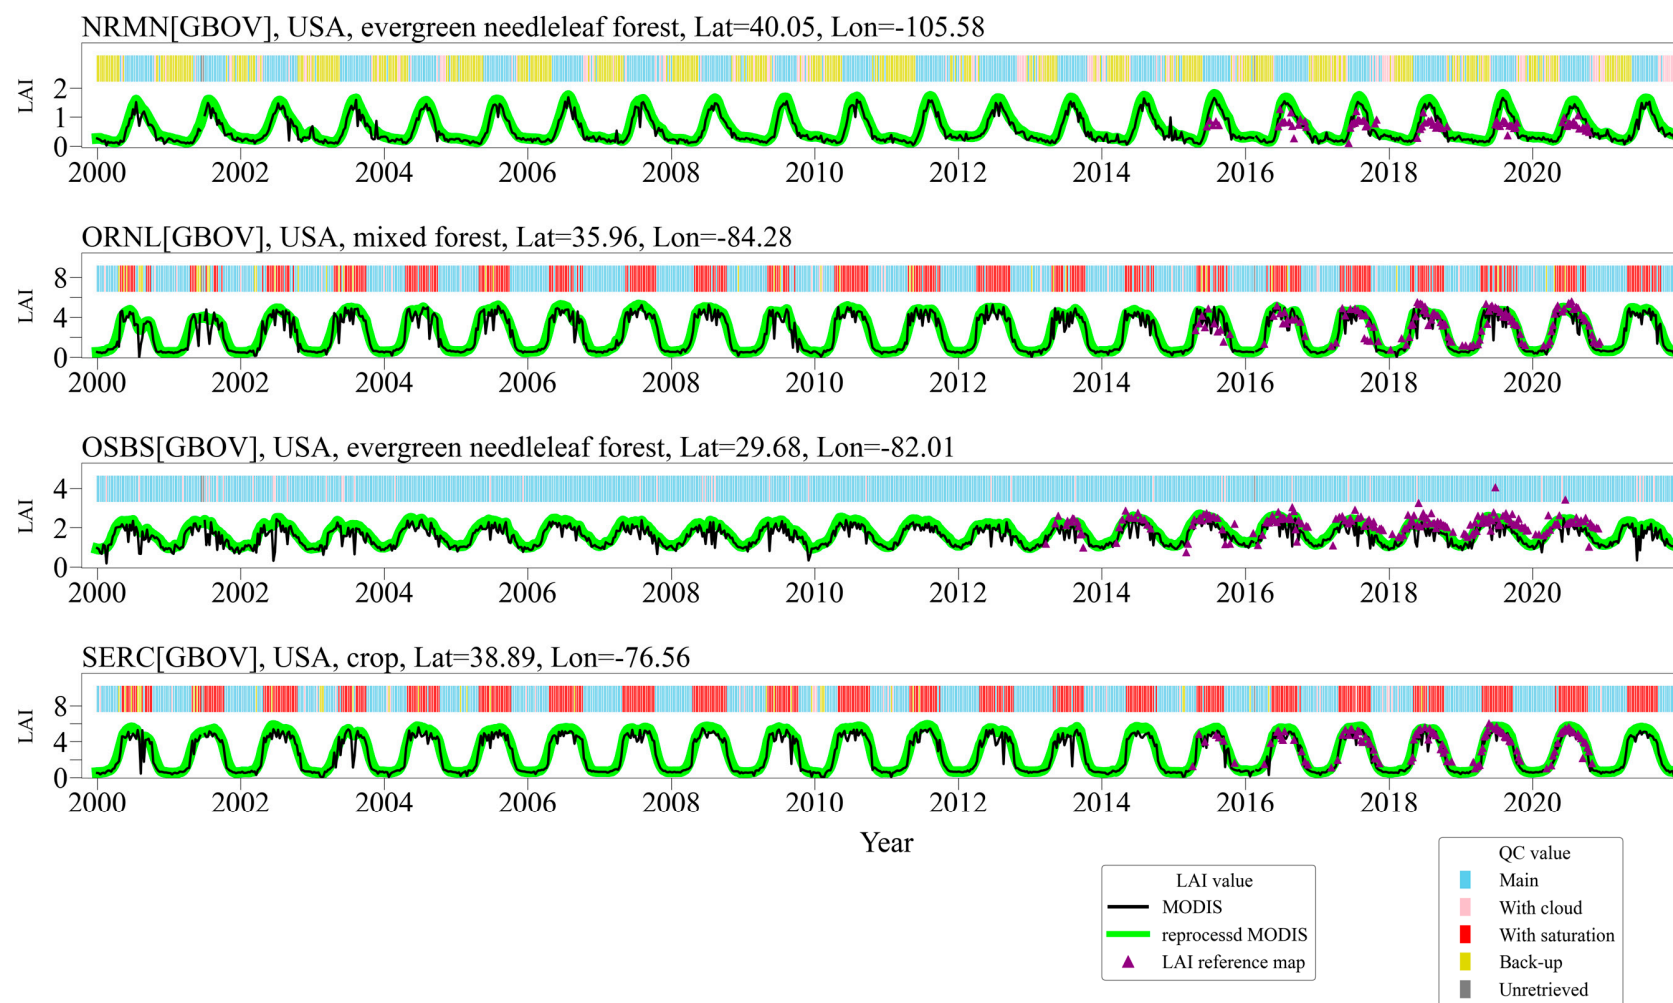

Figure S4. Time series plot of LAI mean values within the reference map extent for sites NRMN, ORNL, OSBS, SERC from GBOV dataset. The QC values, which indicate the retrieved algorithms, are drawn in different colors on the top of time series.

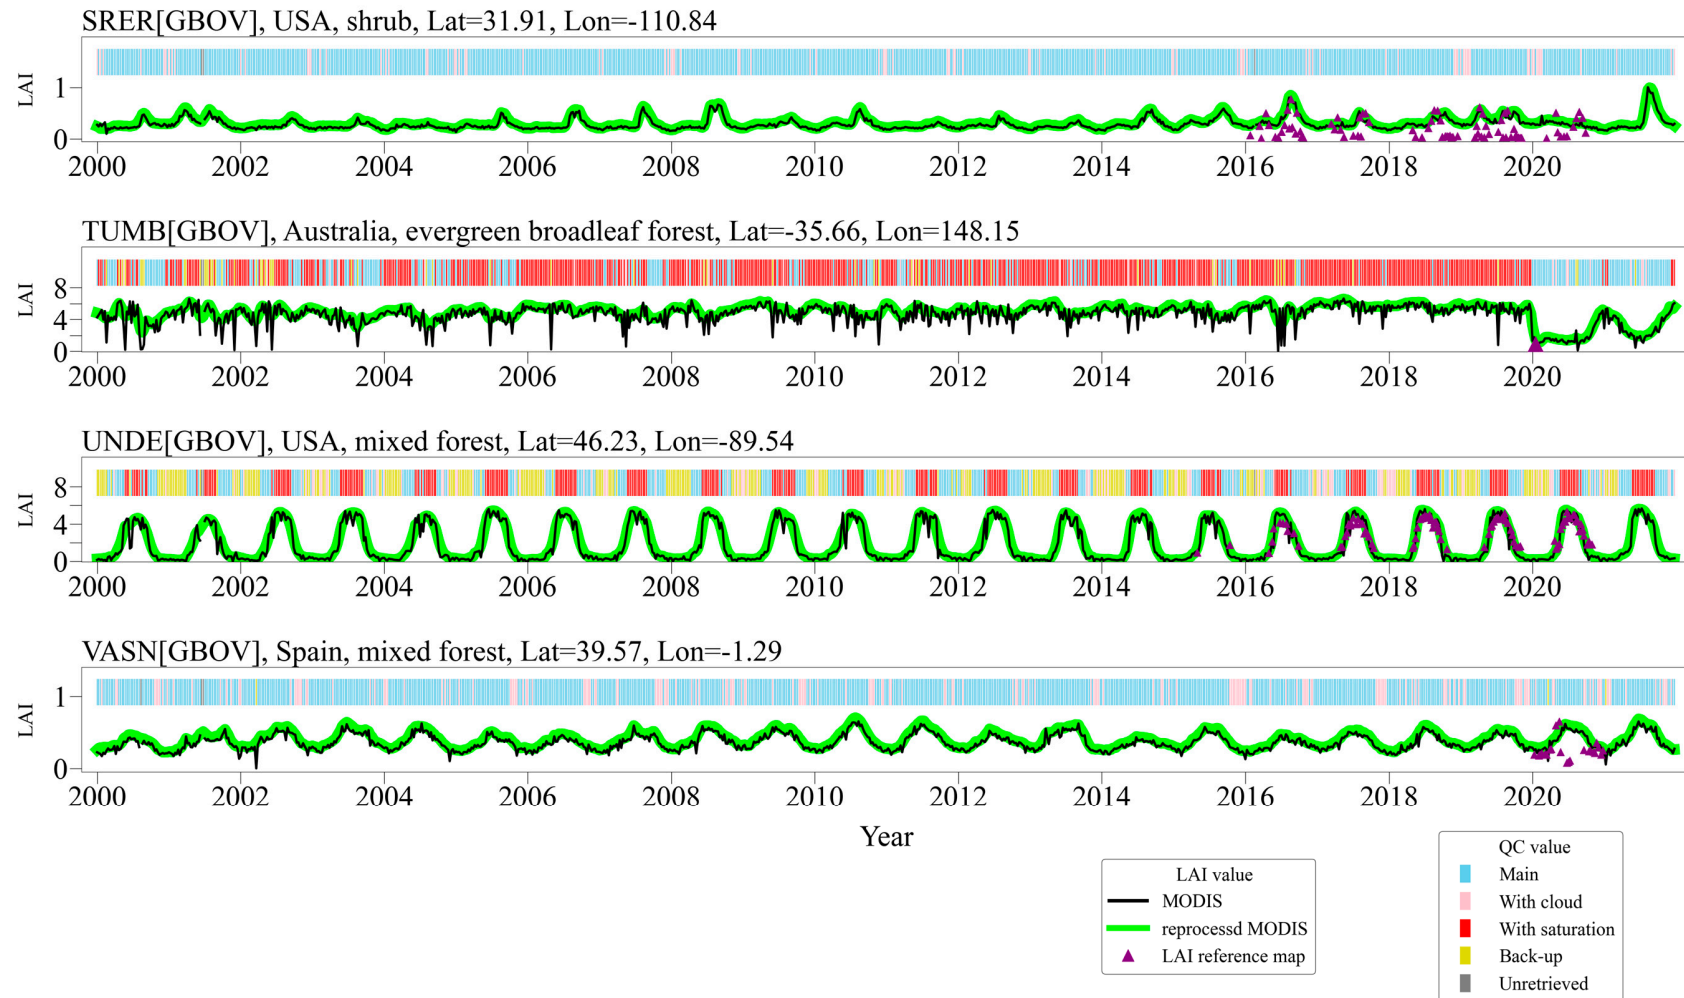

Figure S5. Time series plot of LAI mean values within the reference map extent for sites SRER, TUMB, UNDE, VASN from GBOV dataset. The QC values, which indicate the retrieved algorithms, are drawn in different colors on the top of time series.



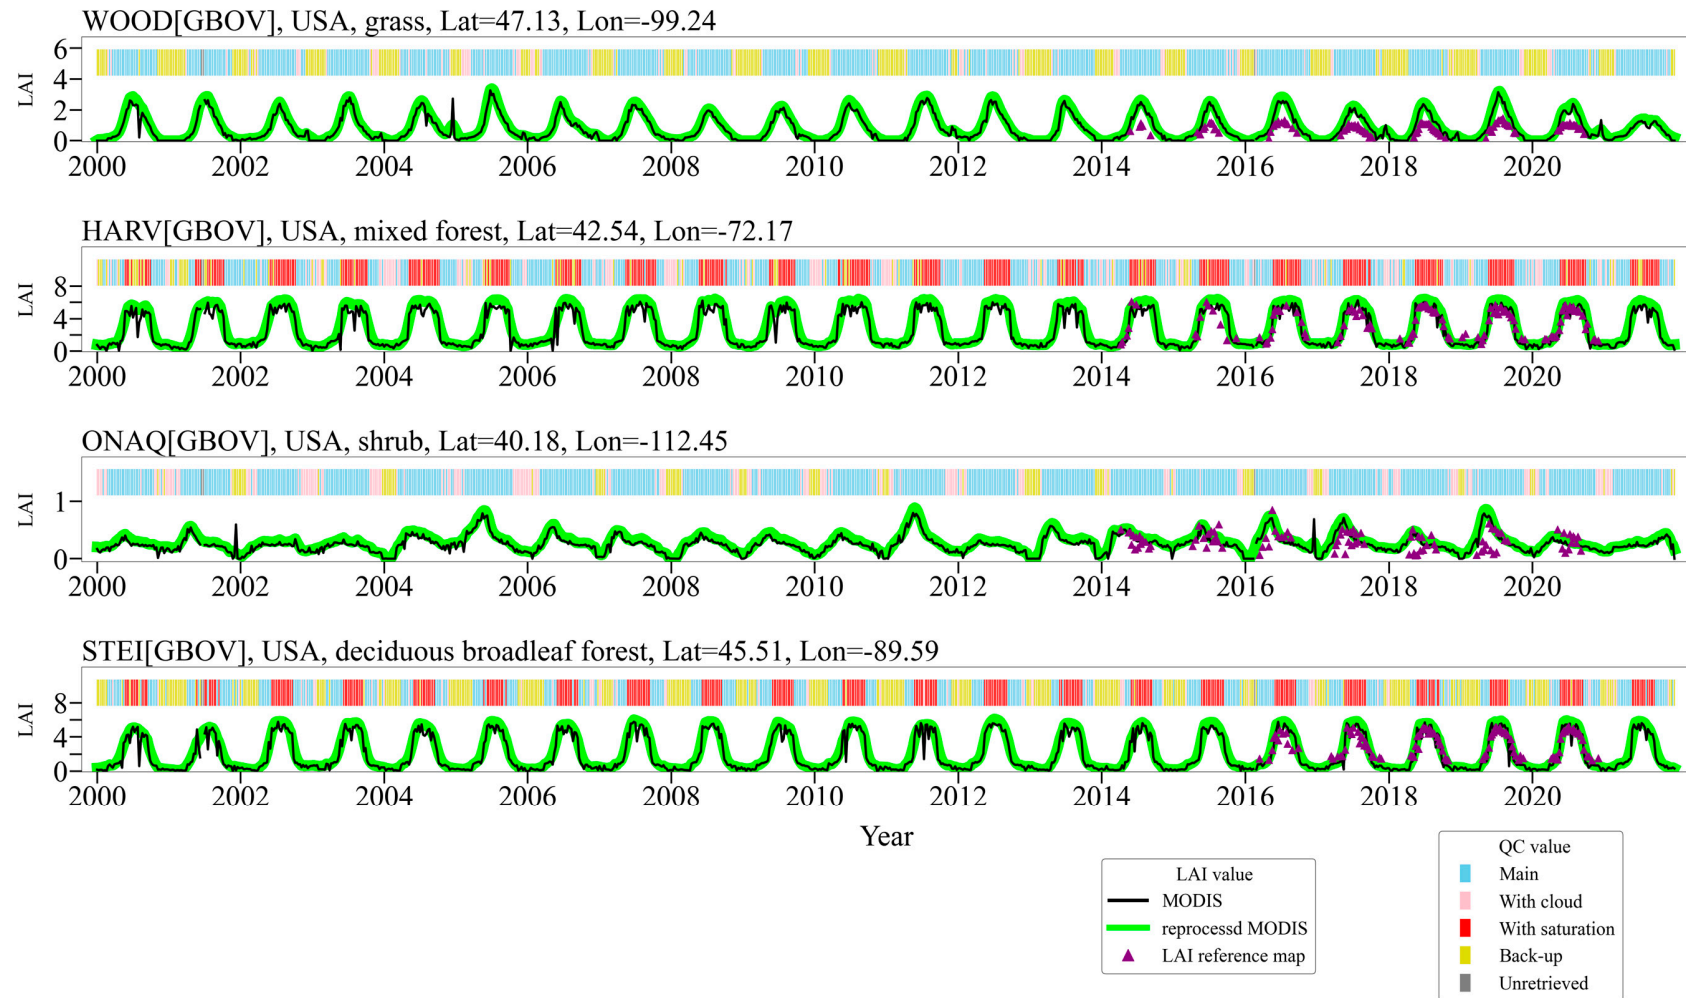

Figure S6. Time series plot of LAI mean values within the reference map extent for sites WOOD, HARV, ONAQ, STEI from GBOV dataset. The QC values, which indicate the retrieved algorithms, are drawn in different colors on the top of time series.

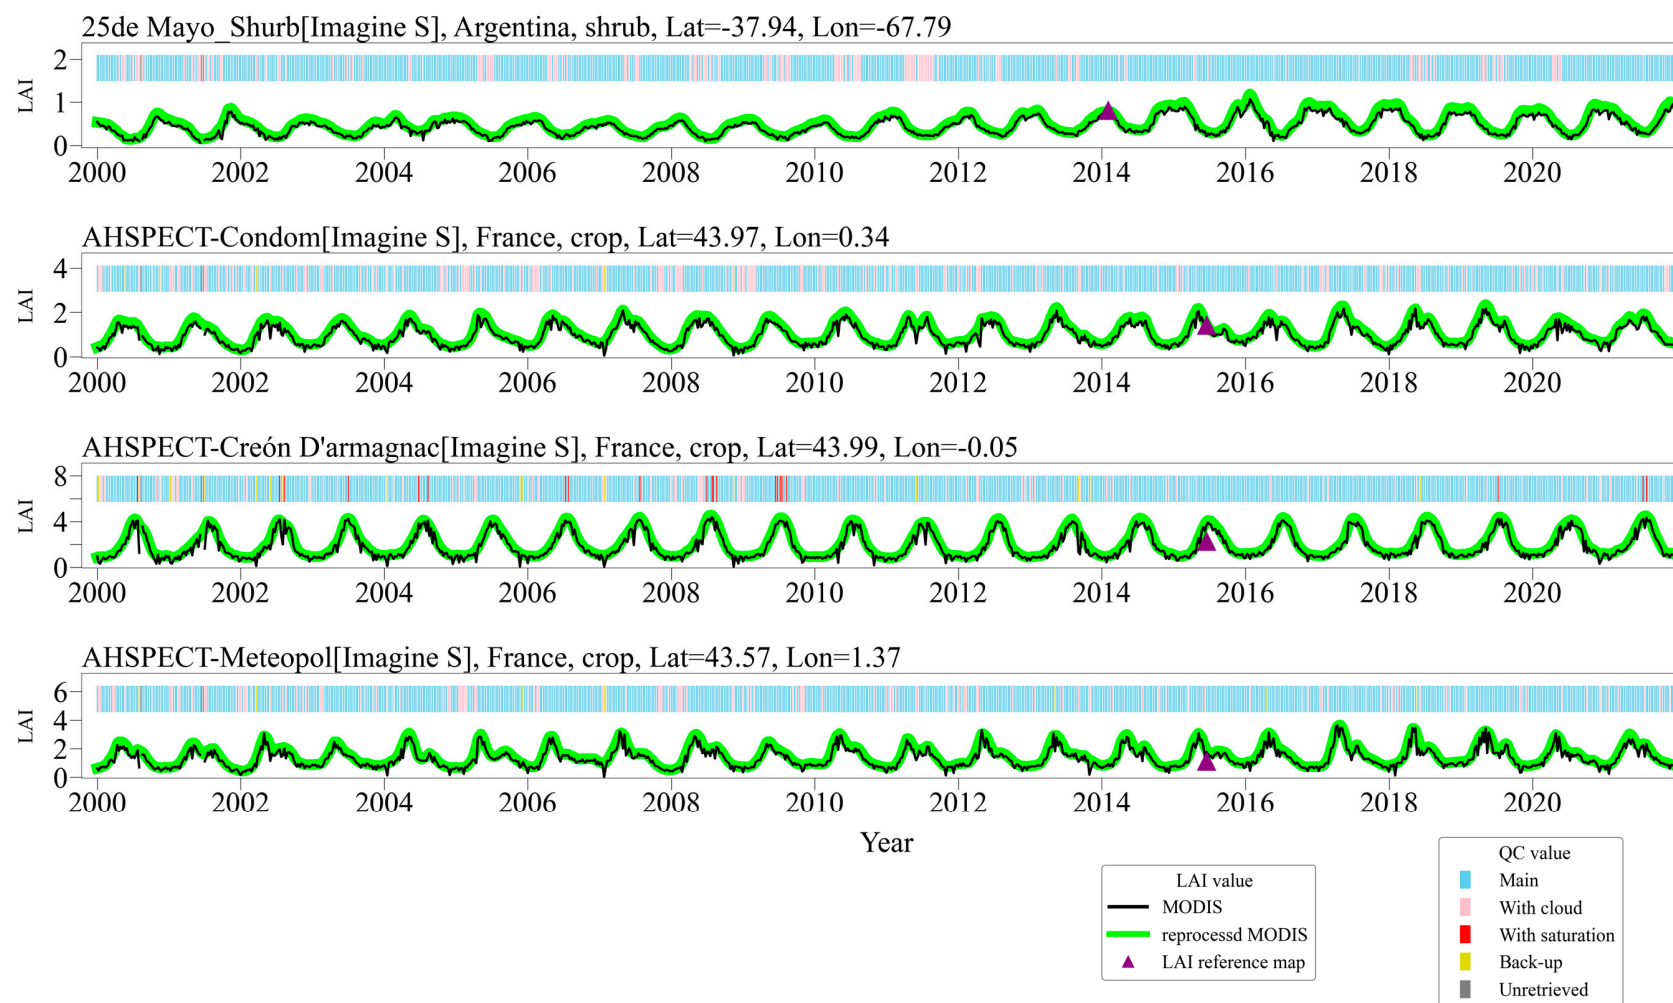

Figure S7. Time series plot of LAI mean values within the reference map extent for sites 25de Mayo\_Shurb, AHSPECT-Condom, AHSPECT-Creón D'armagnac, AHSPECT-Meteopol from ImagineS dataset. The QC values, which indicate the retrieved algorithms, are drawn in different colors on the top of time series.

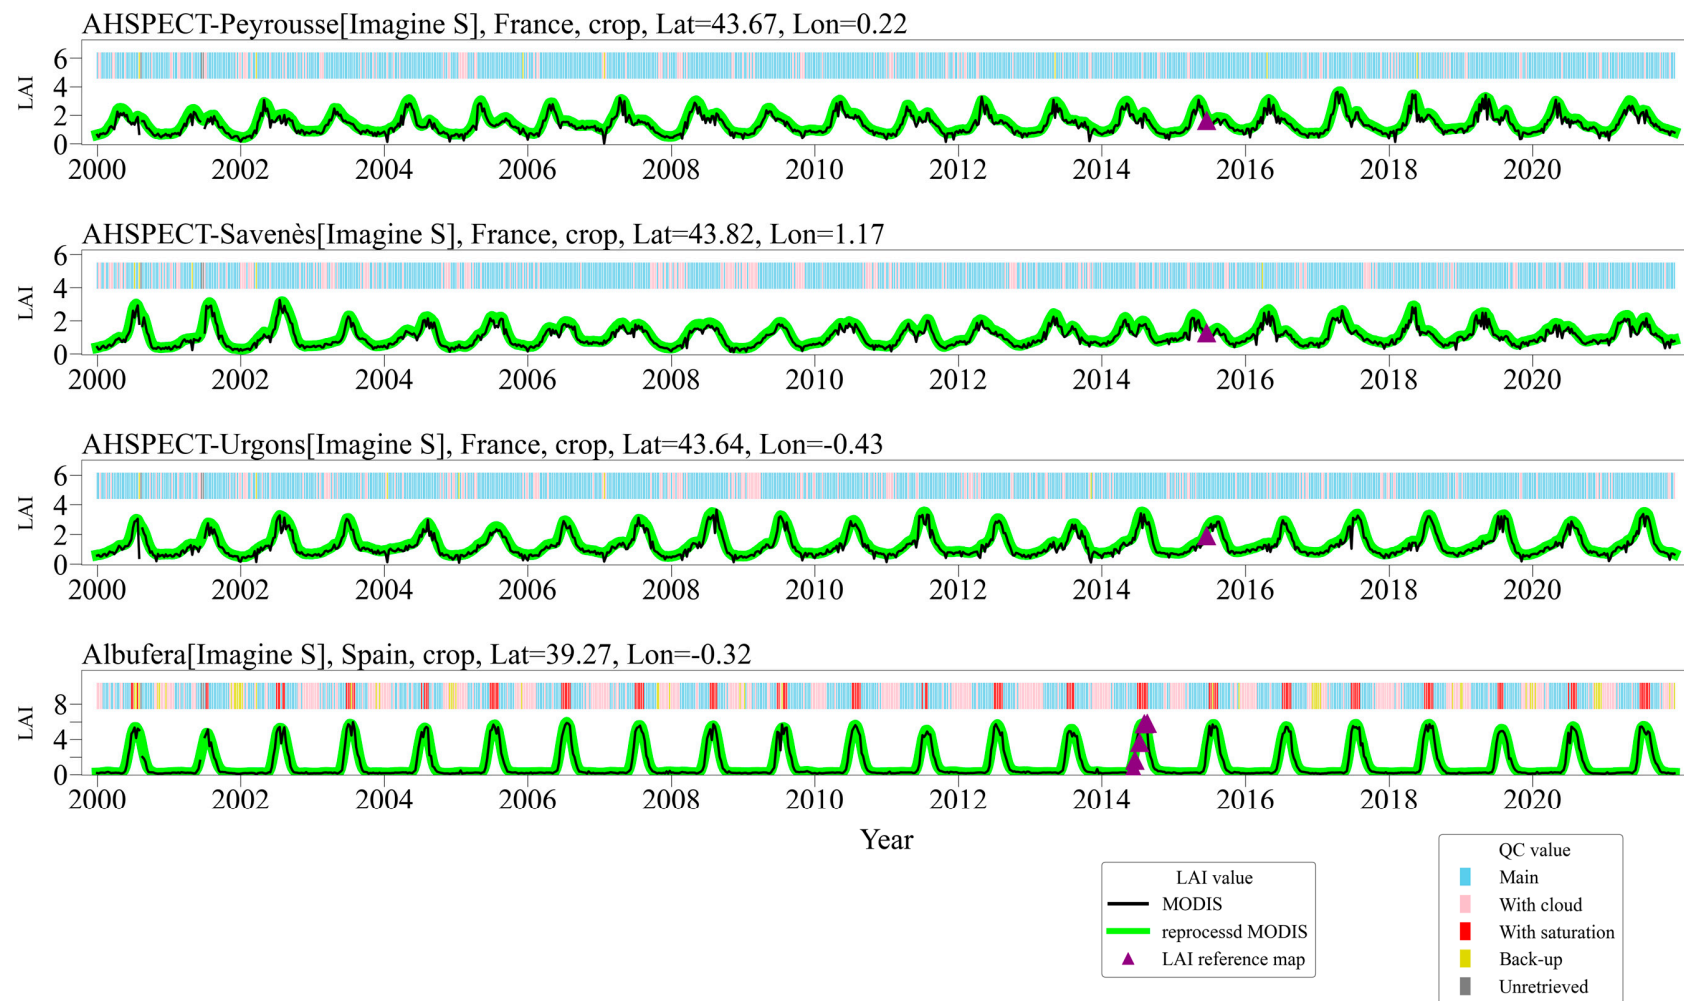

Figure S8. Time series plot of LAI mean values within the reference map extent for sites AHSPECT-Peyrousse, AHSPECT-Savenès, AHSPECT-Urgons, Albufera from ImagineS dataset. The QC values, which indicate the retrieved algorithms, are drawn in different colors on the top of time series.



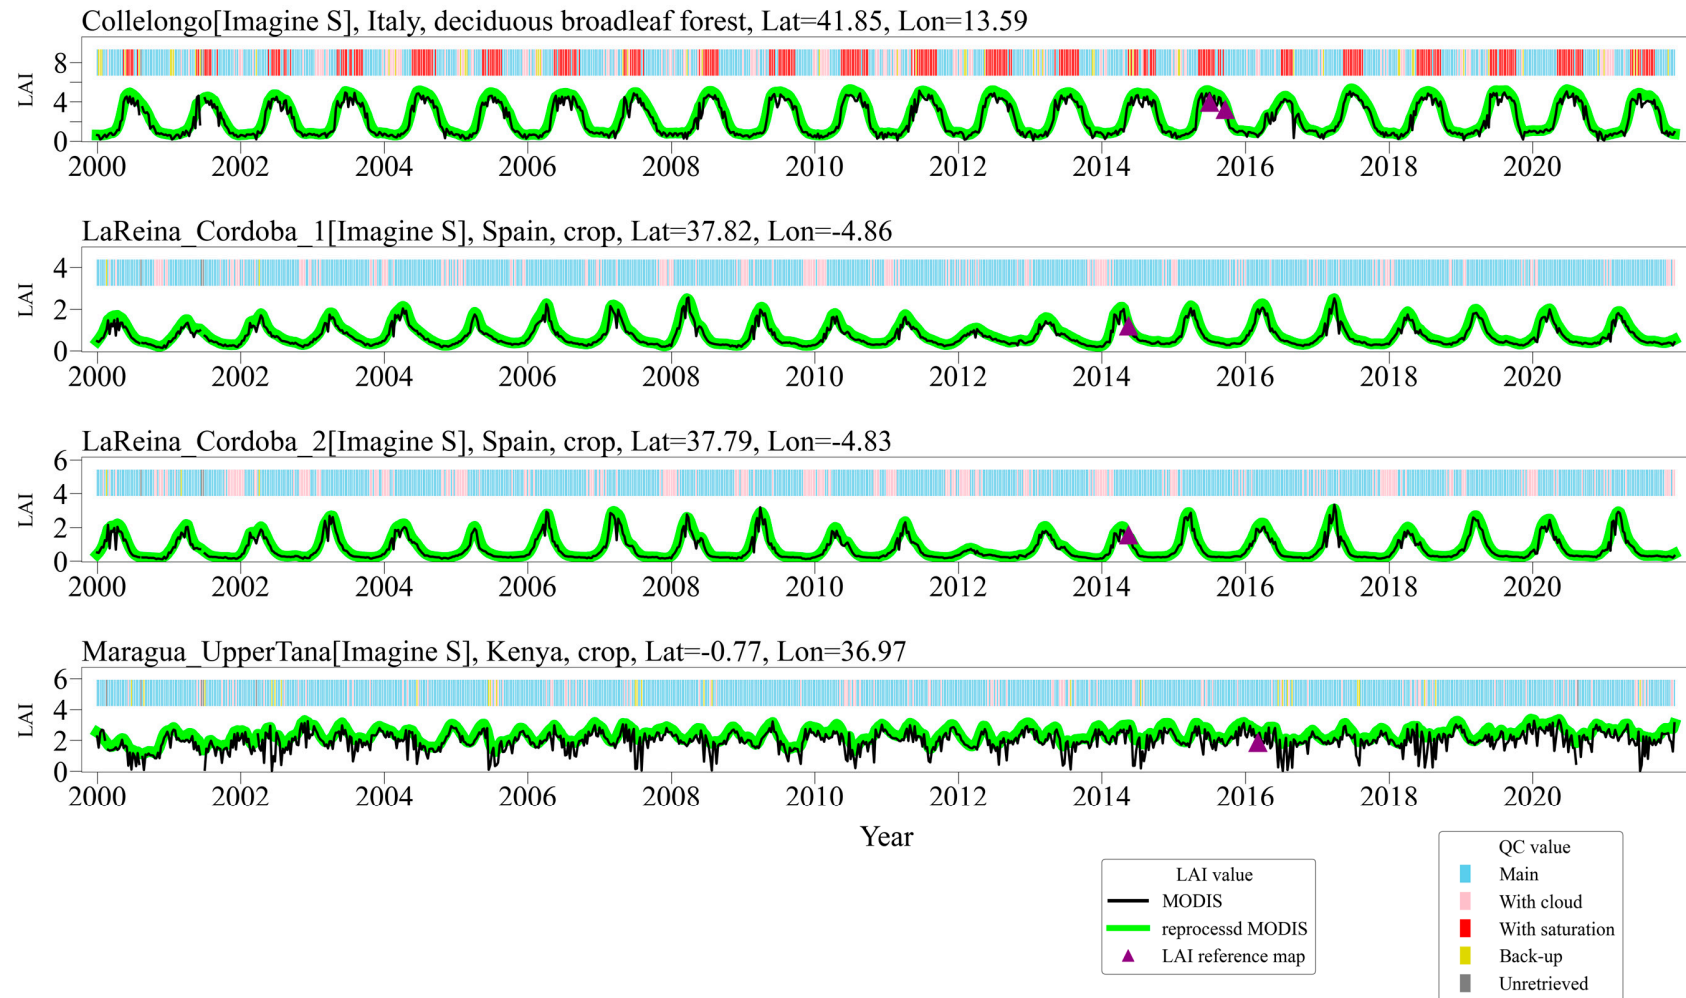

Figure S9. Time series plot of LAI mean values within the reference map extent for sites Collelongo, LaReina\_Cordoba\_1, LaReina\_Cordoba\_2, Maragua\_UpperTana from ImagineS dataset. The QC values, which indicate the retrieved algorithms, are drawn in different colors on the top of time series.

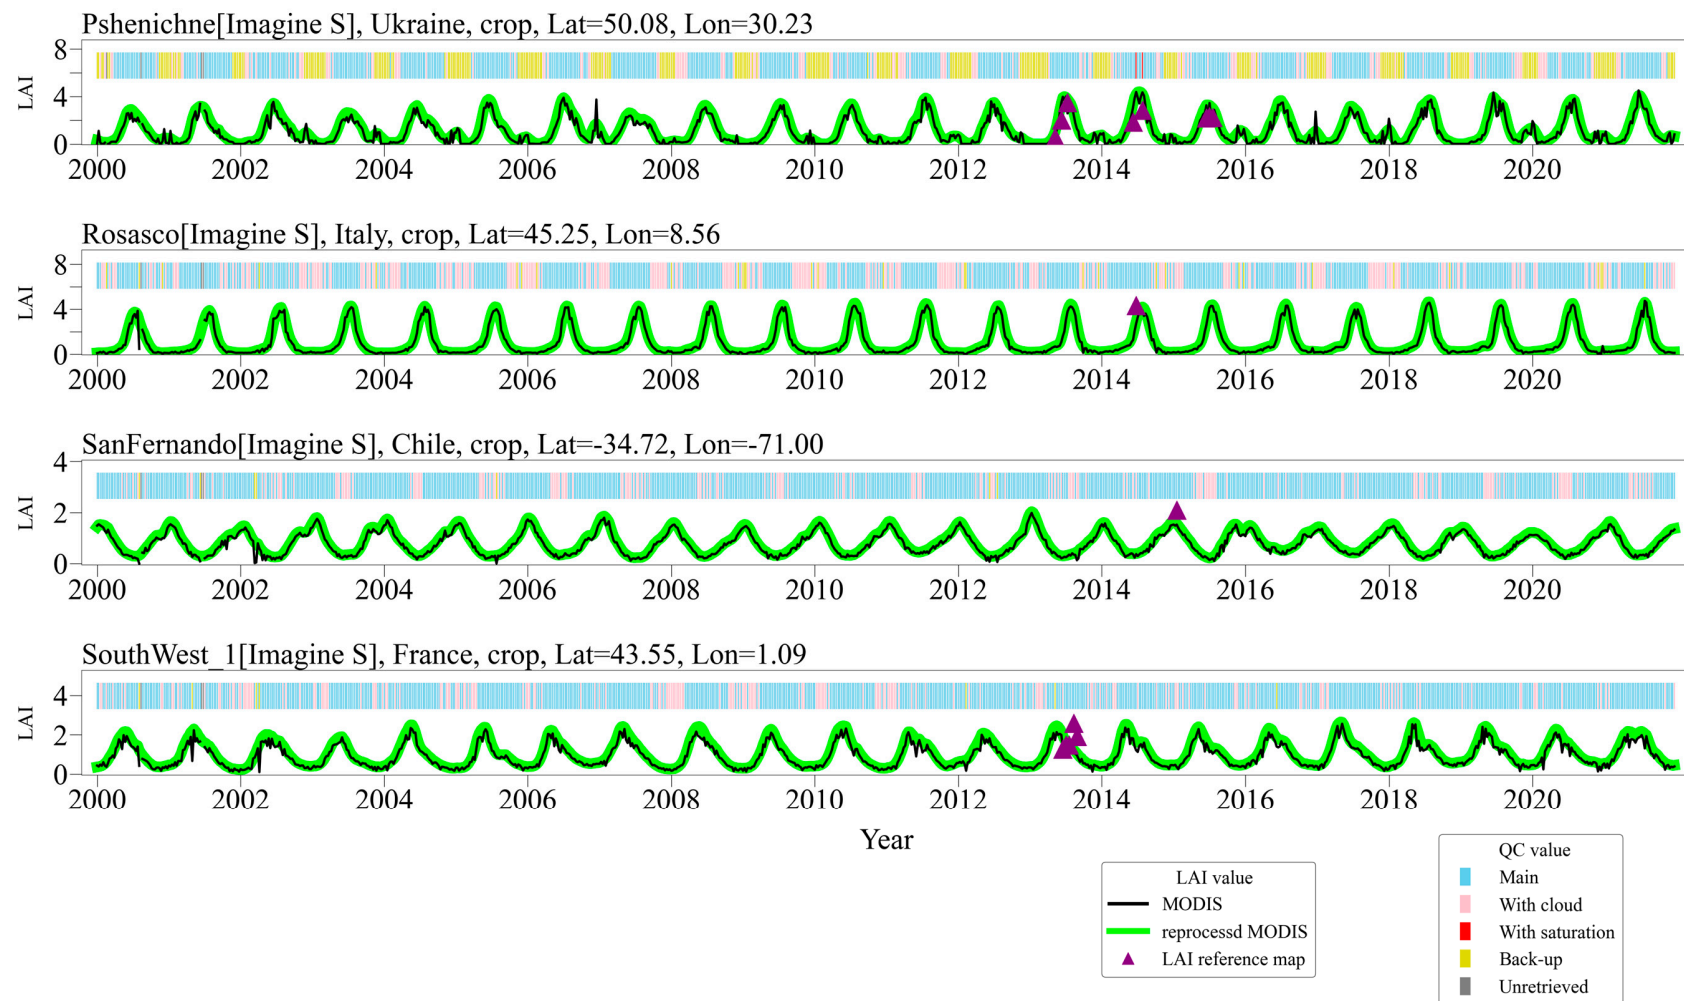

Figure S10. Time series plot of LAI mean values within the reference map extent for sites Pshenichne, Rosasco, SanFernando, SouthWest\_1 from ImagineS dataset. The QC values, which indicate the retrieved algorithms, are drawn in different colors on the top of time series.

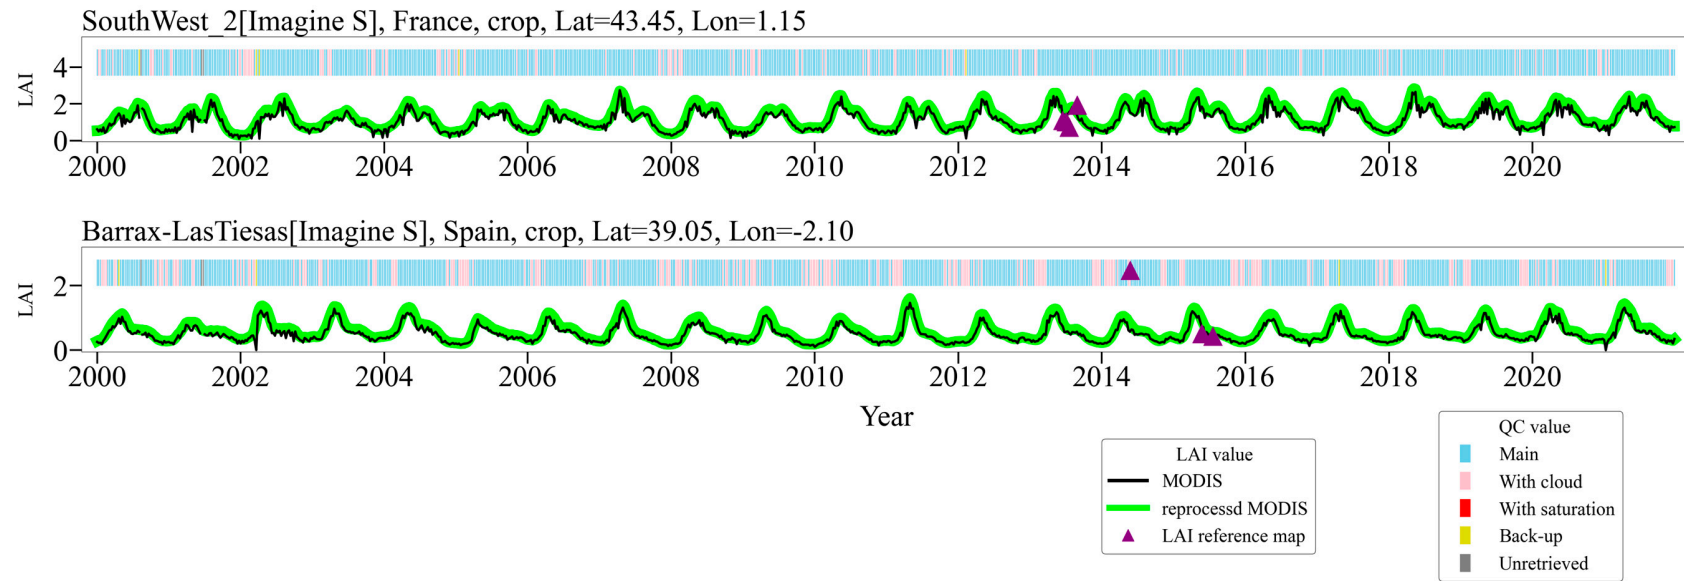

Figure S11. Time series plot of LAI mean values within the reference map extent for sites SouthWest\_2 and Barrax-LasTiesas from ImagineS dataset. The QC values, which indicate the retrieved algorithms, are drawn in different colors on the top of time series.

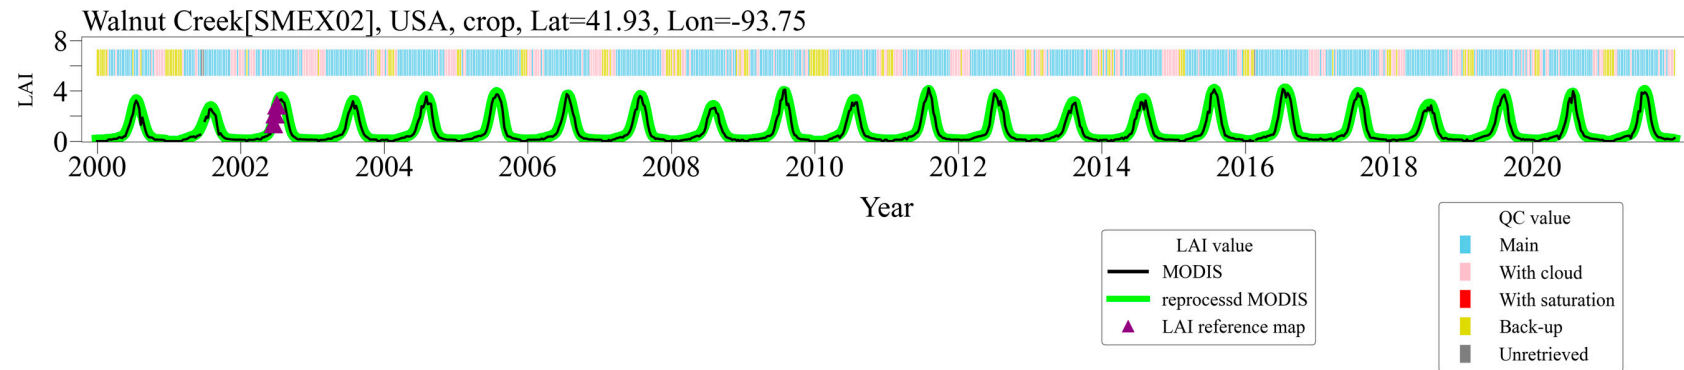

Figure S12. Time series plot of LAI mean values within the reference map extent for site Walnut Creek from SMEX02 dataset. The QC values, which indicate the retrieved algorithms, are drawn in different colors on the top of time series.

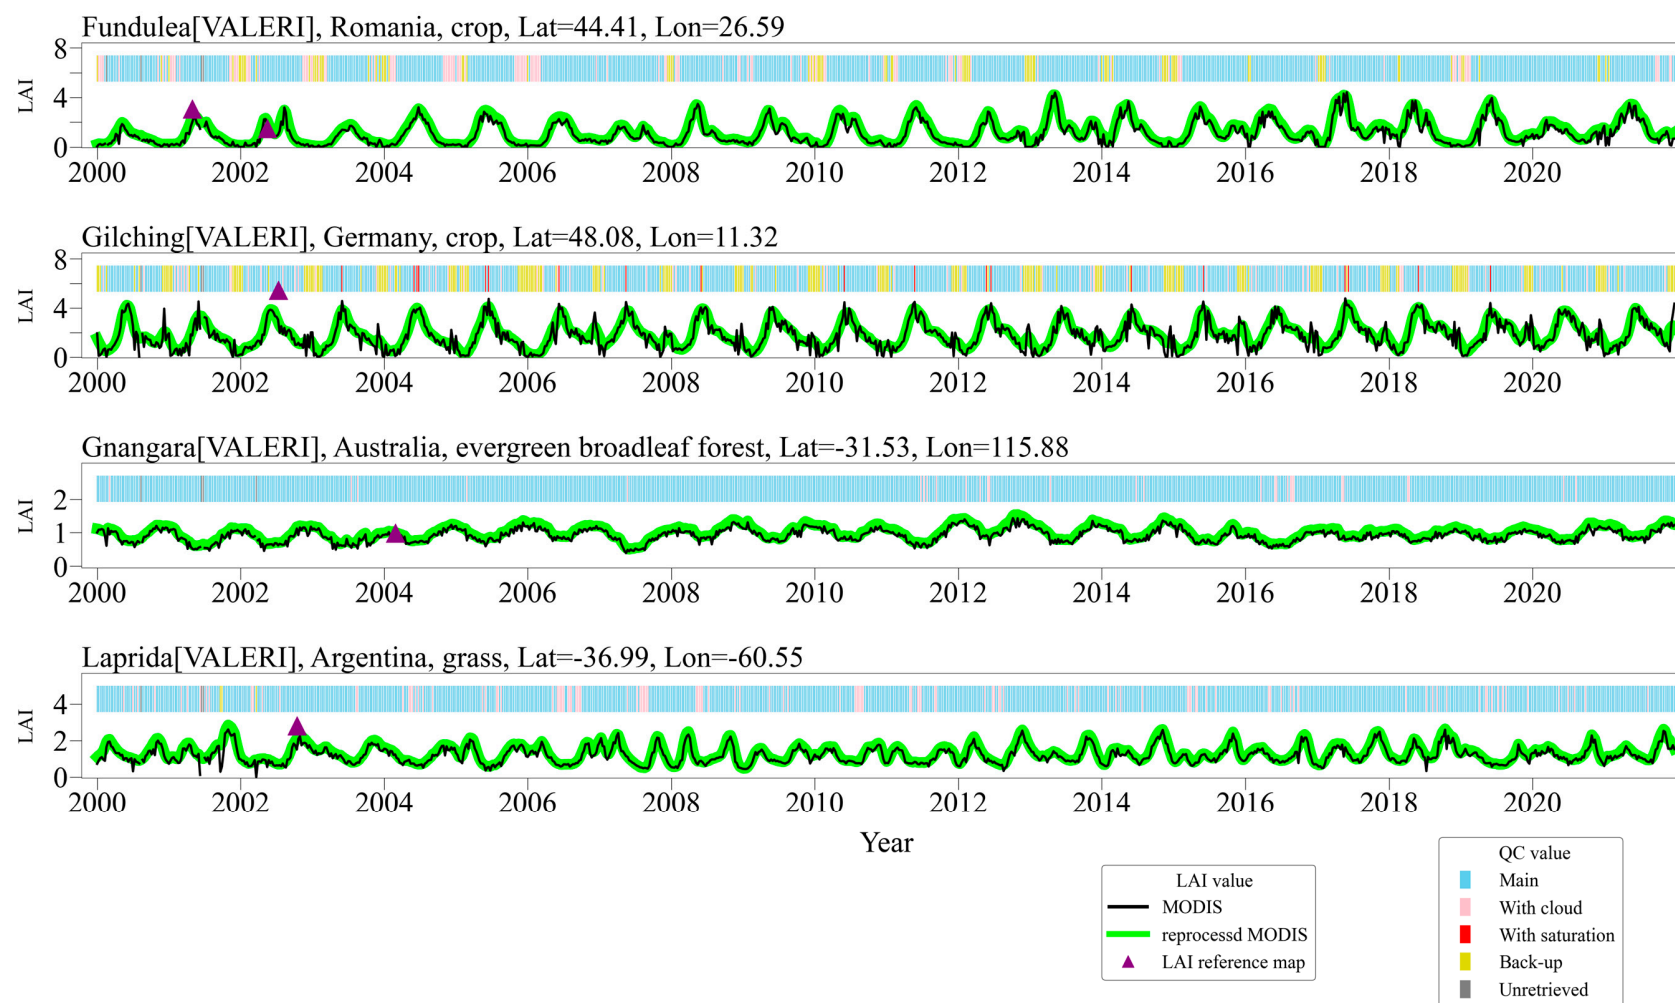

Figure S13. Time series plot of LAI mean values within the reference map extent for sites Fundulea, Gilching, Gngangara, Laprida from VALERI dataset. The QC values, which indicate the retrieved algorithms, are drawn in different colors on the top of time series.

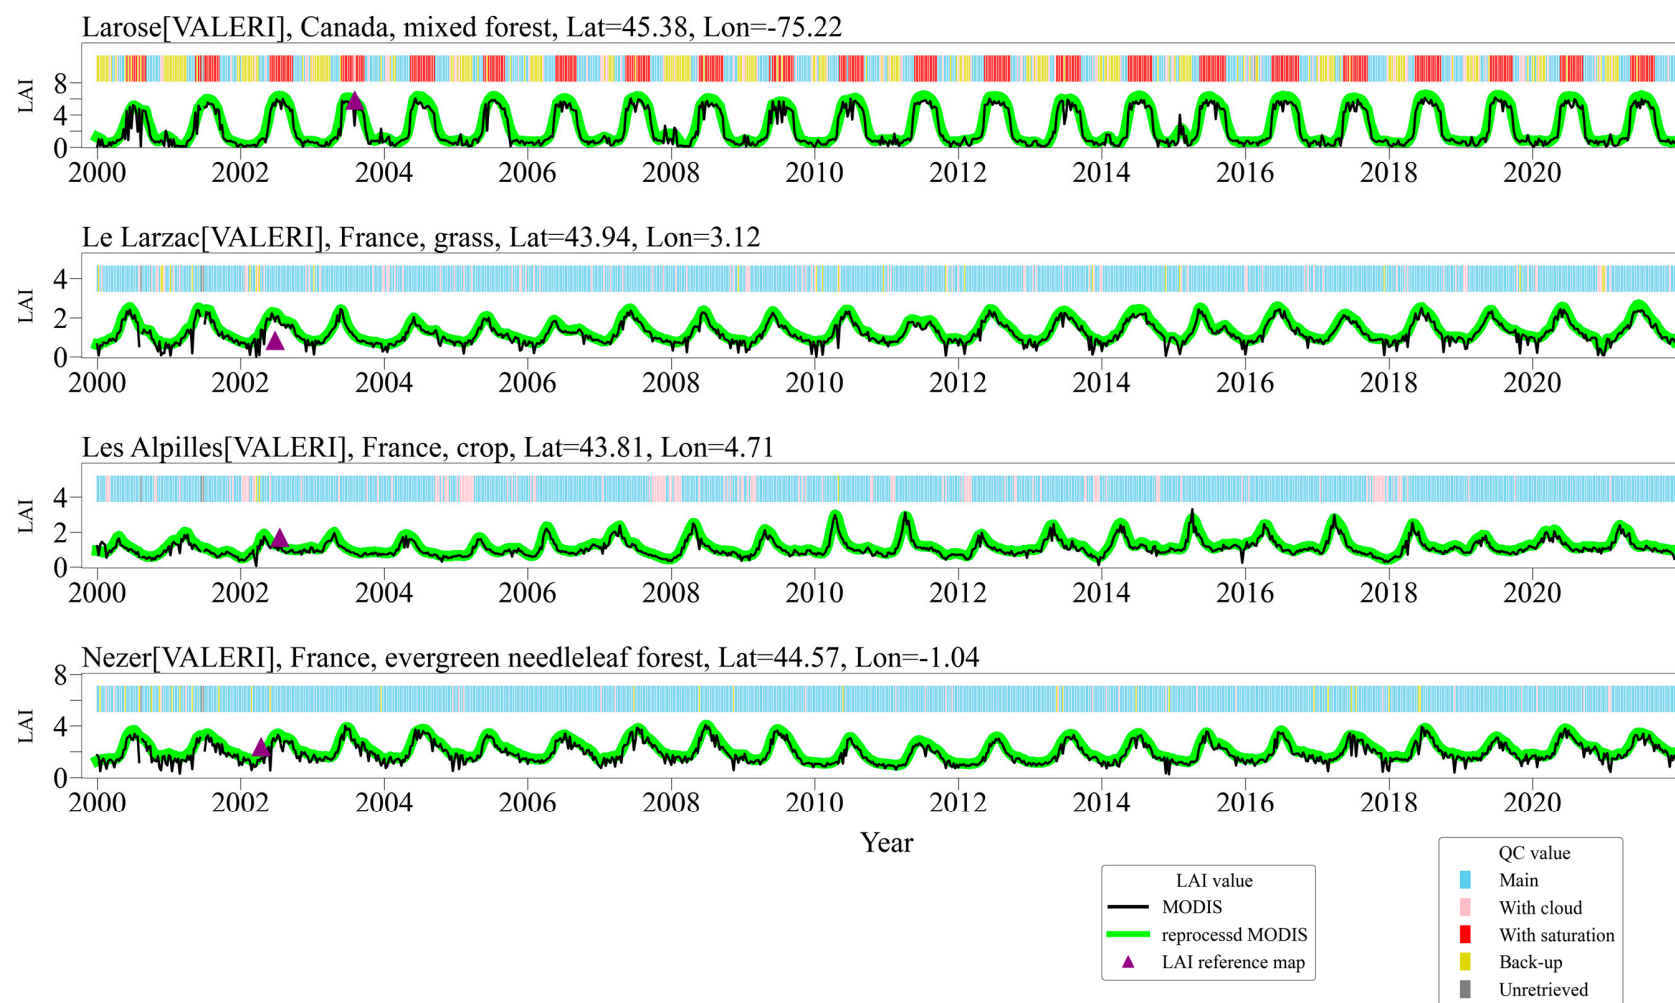

Figure S14. Time series plot of LAI mean values within the reference map extent for sites Larose, Le Larzac, Les Alpilles, Nezer from VALERI dataset. The QC values, which indicate the retrieved algorithms, are drawn in different colors on the top of time series.



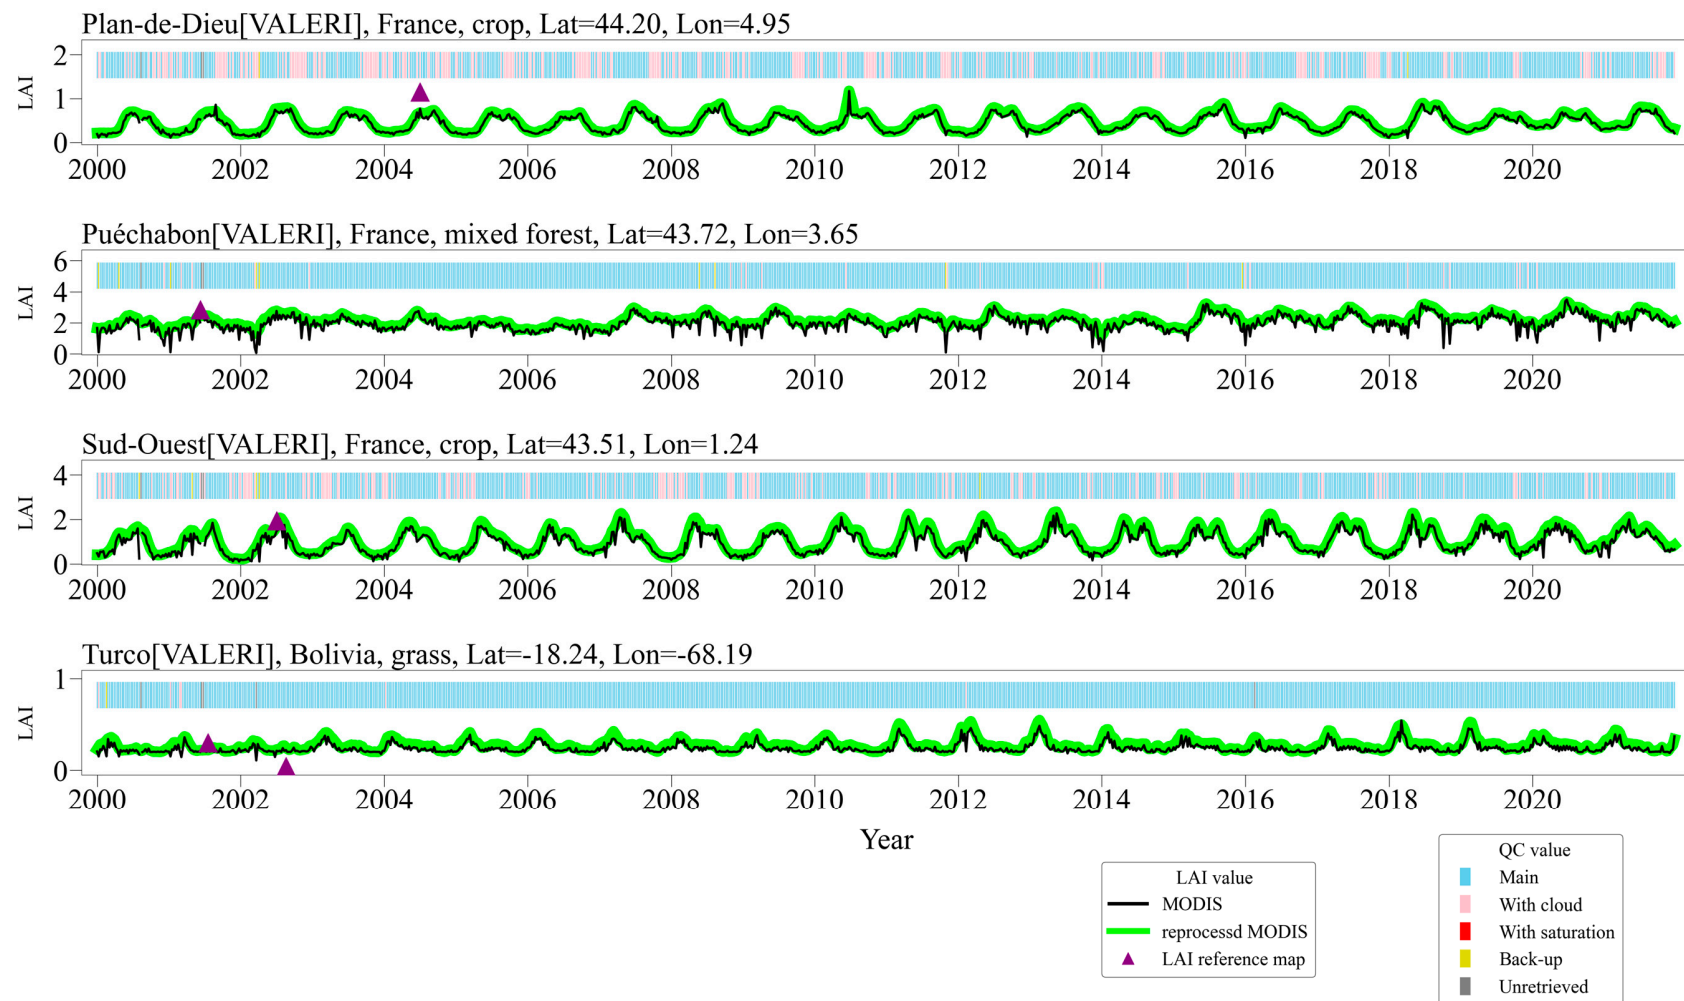

Figure S15. Time series plot of LAI mean values within the reference map extent for sites Plan-de-Dieu, Puechabon, Sud-Ouest, Turco from VALERI dataset. The QC values, which indicate the retrieved algorithms, are drawn in different colors on the top of time series.

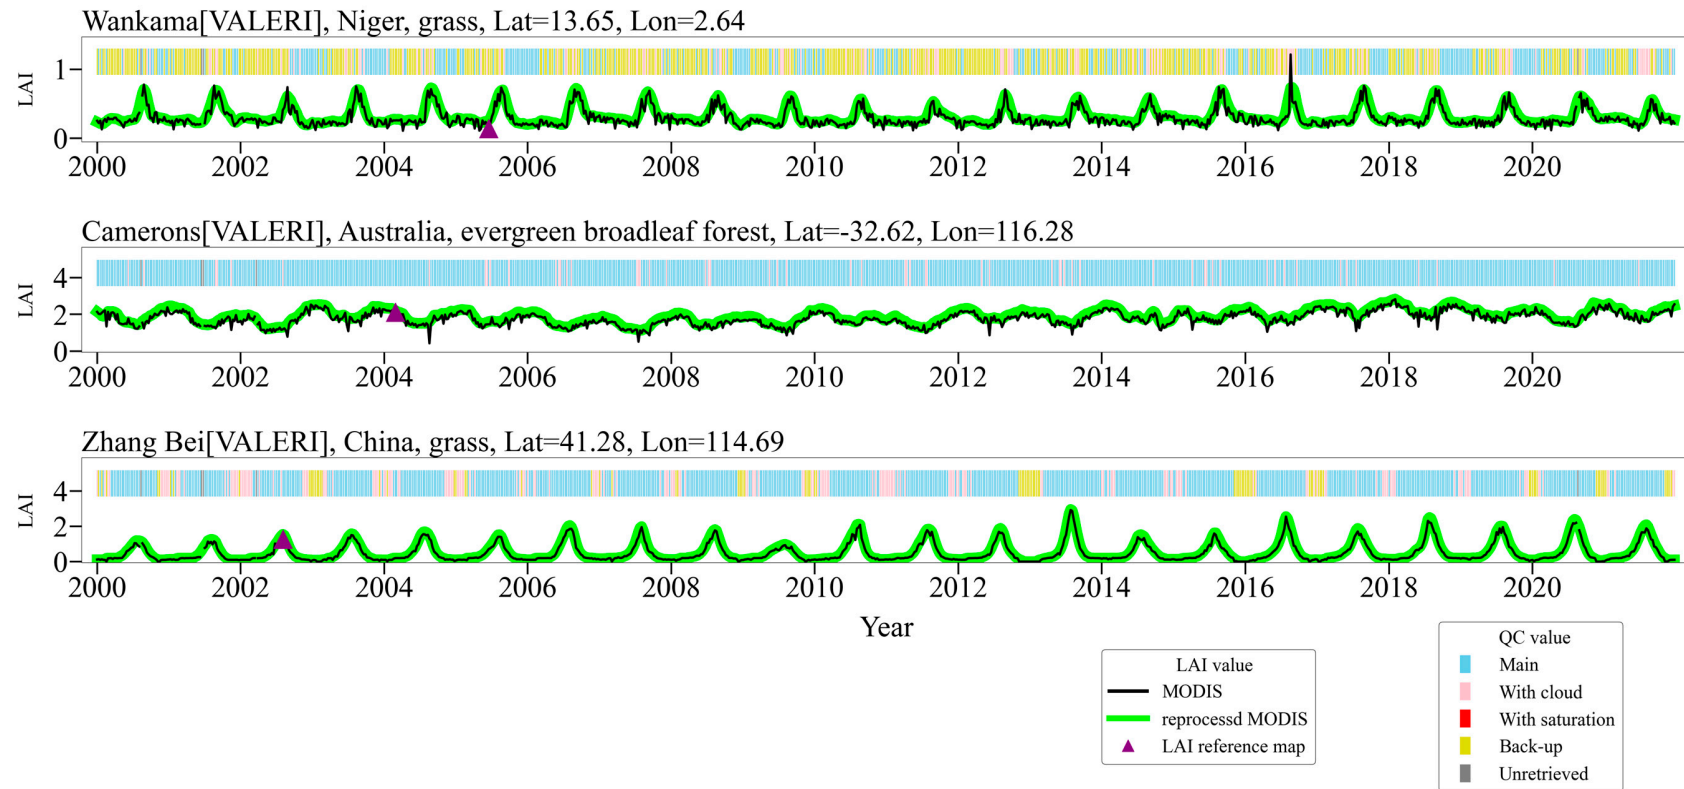

Figure S16. Time series plot of LAI mean values within the reference map extent for sites Wankama, Camerons and Zhang Bei from VALERI dataset. The QC values, which indicate the retrieved algorithms, are drawn in different colors on the top of time series.



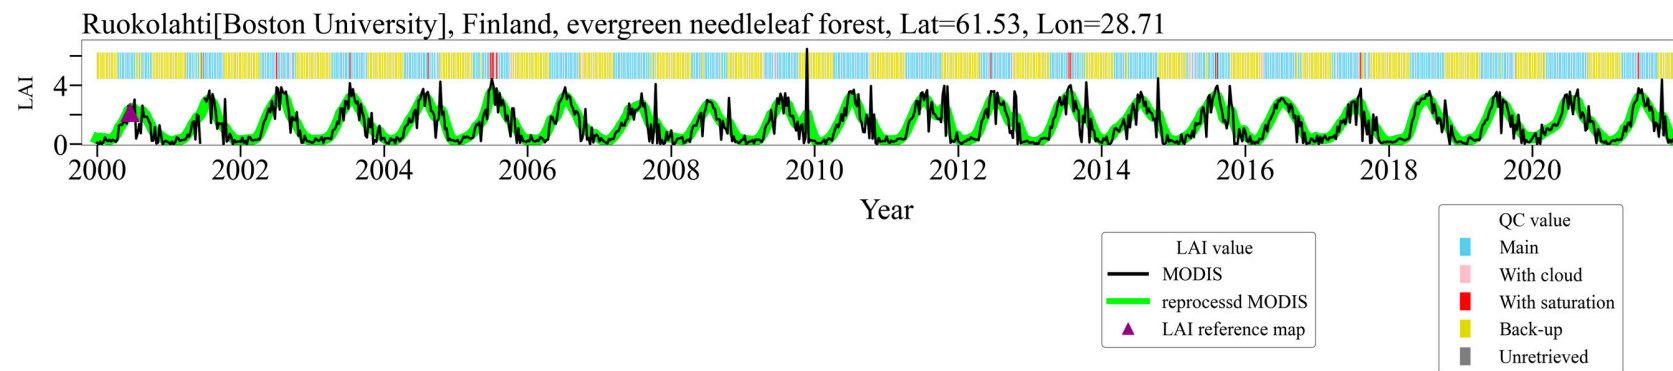

Figure S17. Time series plot of LAI mean values within the reference map extent for site Ruokolahti from Boston University dataset. The QC values, which indicate the retrieved algorithms, are drawn in different colors on the top of time series.

### 3. Global growing season mean LAI values and trends of different LAI products

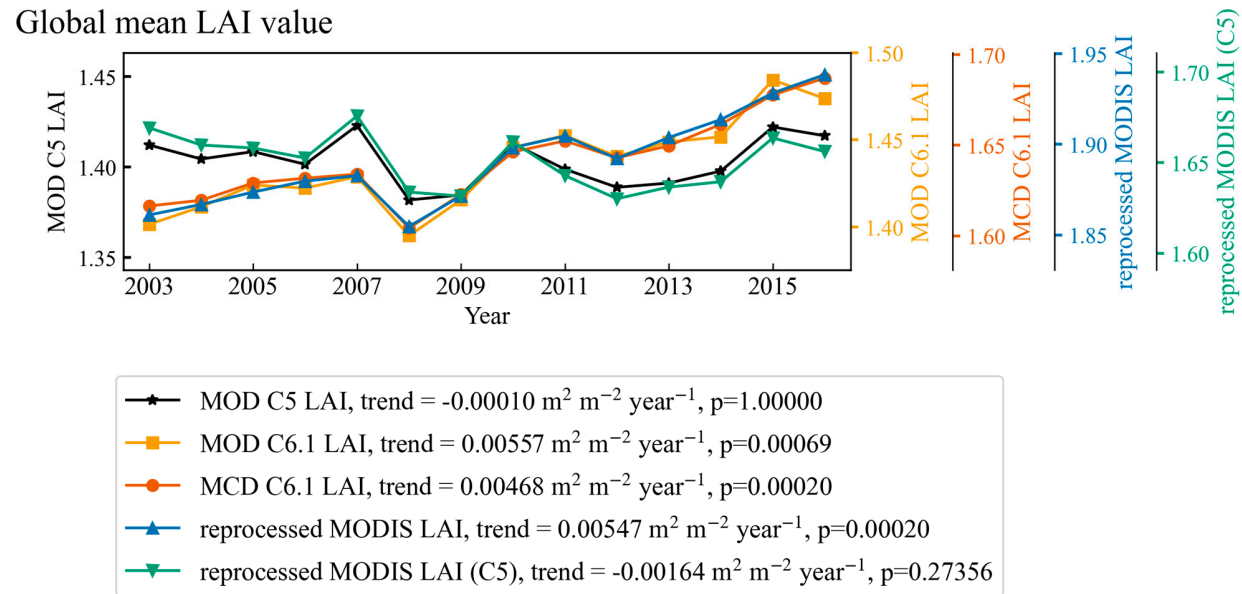

Figure S18. Linear trends of the global growing season mean LAI values of different LAI products during their overlapped period 2003–2016.

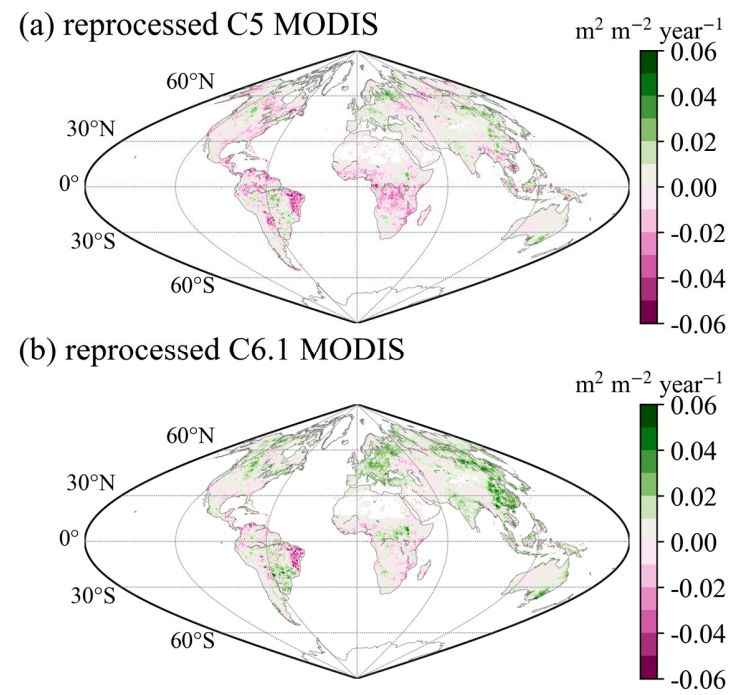

Figure S19. Linear trends of the growing season mean LAI of (a) reprocessed C5 LAI and (b) reprocessed C6.1 LAI during the period 2003–2016.
